# Supplementary material for: Age-dependent alterations of decorin glycosaminoglycans in human skin
Source: PubMed Central journal article supplement — Sci Rep. 2013 Aug 13;3:2422. doi: 10.1038/srep02422 (PMC3741628; doi:10.1038/srep02422), 2013-08-13
Supplement: srep02422-s1.pdf [file srep02422-s1.pdf]

# Age-dependent alterations of decorin glycosaminoglycans in human skin

Yong Li, Ying Liu, Wei Xia, Dan Lei, John J Voorhees, Gary J Fisher\*

## Supplemental Figure 1

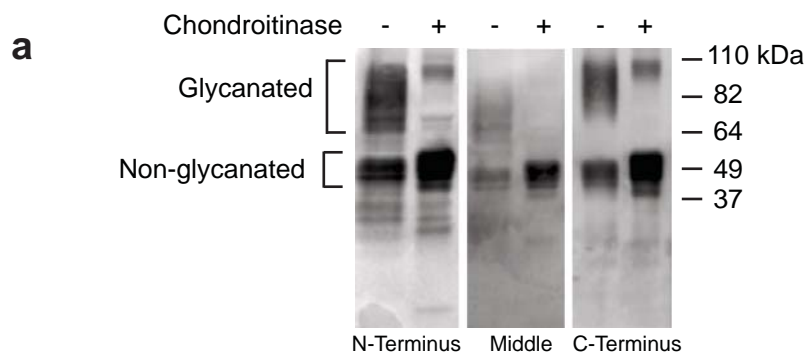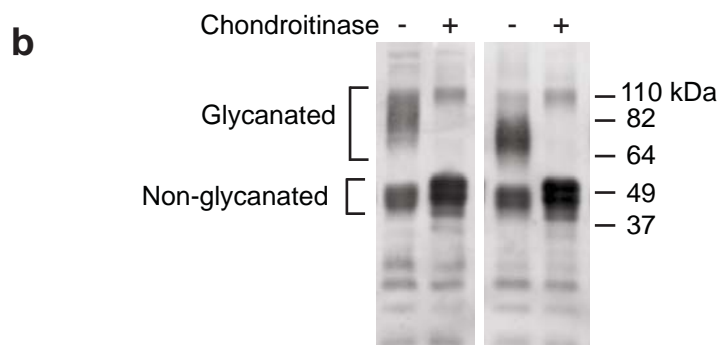

**Supplemental Figure 1:** Full-length blots for Figure 4. (a) Full-length blot for Figure 4b. (b) Full length blot for Figure 4c.

## Supplemental Figure 2

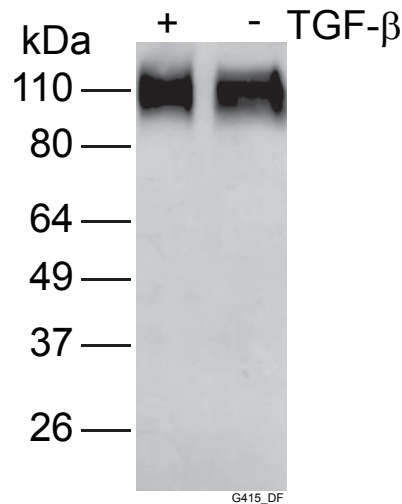

**Supplemental Figure 2:** Exogenous TGF-β treatment does not alter decorin molecular weight in primary human skin fibroblast cultures. Fibroblasts cultured in serum-free DMEM were incubated with or without TGF-β (2ng/ml) for 24 hours. Decorin in culture medium (40μl) was examined by Western analysis. Western blots show decorin has molecular weight around 110 kDa. Decorin molecular weight did not differ with or without TGF-beta treatment. The Western blot is representative of three independent experiments.

The decorin band appeared in the Western blot was confirmed by treatment of cultured fibroblasts with decorin siRNA which reduced fibroblast production of decorin by over 90% at both mRNA and protein levels as evidenced by real-time PCR and Western analysis, respectively (data not shown). The bioactivity of exogenous TGF-beta was validated by quantitation of gene expression of a known TGF-β-responsive gene, connective tissue growth factor, which was induced by approximately 5-fold upon TGF-β treatment in fibroblast cultures.
